# Supplementary material for: Efficient enhancement of magnetic anisotropy by optimizing the ligand-field in a typically tetranuclear dysprosium cluster
Source: Royal Society of Chemistry journal article supplement (doi:10.1039/c5dt00880h), 2015-01-01
Supplement: c5dt00880h1.pdf [file c5dt00880h1.pdf]

### Supporting Information

#### **Efficient Enhancement of Magnetic Anisotropy by Optimizing Ligand-Field in a Typically Tetranuclear Dysprosium Cluster**

Jiang Liu, Yan-Cong Chen, Zhong-Xia Jiang, Jun-Liang Liu, Jian-Hua Jia\* Long-Fei Wang, Quan-Wen Li, and Ming-Liang Tong\*

Key Laboratory of Bioinorganic and Synthetic Chemistry of Ministry of Education, School of Chemistry and Chemical Engineering, Sun Yat-Sen University, Guangzhou 510275, P. R. China

Table S1. Summary of the structural data for complexes **1** and **2**

| Complex                                      | <b>1</b>                                                                                        | <b>2</b>                                                                                        |
|----------------------------------------------|-------------------------------------------------------------------------------------------------|-------------------------------------------------------------------------------------------------|
| formula                                      | C <sub>56</sub> H <sub>72</sub> Cl <sub>4</sub> Dy <sub>4</sub> N <sub>20</sub> O <sub>14</sub> | C <sub>56</sub> H <sub>72</sub> Br <sub>4</sub> Dy <sub>4</sub> N <sub>20</sub> O <sub>14</sub> |
| $M_r$                                        | 2041.14                                                                                         | 2218.94                                                                                         |
| Crystal system                               | triclinic                                                                                       | triclinic                                                                                       |
| Space group                                  | <i>P</i> -1                                                                                     | <i>P</i> -1                                                                                     |
| $a$ [Å]                                      | 11.6810(9)                                                                                      | 11.6203(9)                                                                                      |
| $b$ [Å]                                      | 12.2354(9)                                                                                      | 12.2946(8)                                                                                      |
| $c$ [Å]                                      | 14.2356(10)                                                                                     | 14.2923(10)                                                                                     |
| $\alpha$ [°]                                 | 75.848(2)                                                                                       | 75.951(2)                                                                                       |
| $\beta$ [°]                                  | 69.993(2)                                                                                       | 70.984(2)                                                                                       |
| $\gamma$ [°]                                 | 67.549(2)                                                                                       | 68.022(2)                                                                                       |
| $V$ [Å <sup>3</sup> ]                        | 1751.6(2)                                                                                       | 1773.1(2)                                                                                       |
| $Z$                                          | 1                                                                                               | 1                                                                                               |
| $\rho_{\text{calcd}}$ [mg mm <sup>-3</sup> ] | 1.935                                                                                           | 2.078                                                                                           |
| $T$ [K]                                      | 150                                                                                             | 150                                                                                             |
| $F(000)$                                     | 992                                                                                             | 1064                                                                                            |
| Goof on F <sup>2</sup>                       | 1.052                                                                                           | 1.017                                                                                           |
| $R_1$ [I>2 $\sigma$ (I)] <sup>[a]</sup>      | 0.0571                                                                                          | 0.0578                                                                                          |
| $wR_2$ [all data] <sup>[b]</sup>             | 0.1458                                                                                          | 0.1250                                                                                          |

[a]  $R_1 = \sum ||F_o| - |F_c|| / \sum |F_o|$ , [b]  $wR_2 = [\sum w(F_o^2 - F_c^2)^2 / w(F_o^2)^2]^{1/2}$ .

Table S2. Selected Bond Distances (Å) and Bond Angles (°) of complexes **1** and **2**

| Complex 1           |            | Complex 2           |             |
|---------------------|------------|---------------------|-------------|
| Dy(1)-O(2)          | 2.252(4)   | Dy(1)-O(2)          | 2.243(6)    |
| Dy(1)-O(1W)         | 2.408(5)   | Dy(1)-O(1W)         | 2.393(6)    |
| Dy(1)-O(1)          | 2.427(4)   | Dy(1)-O(1)          | 2.432(6)    |
| Dy(1)-N(7)          | 2.428(6)   | Dy(1)-N(7)          | 2.412(7)    |
| Dy(1)-N(2)          | 2.440(6)   | Dy(1)-N(2)          | 2.432(7)    |
| Dy(1)-N(1)          | 2.666(5)   | Dy(1)-N(1)          | 2.662(8)    |
| Dy(1)-N(6)          | 2.690(6)   | Dy(1)-N(6)          | 2.688(8)    |
| Dy(1)-Cl(1)         | 2.7144(17) | Dy(1)-Br(1)         | 2.8886(9)   |
| Dy(2)-O(2)          | 2.242(4)   | Dy(2)-O(2)          | 2.243(6)    |
| Dy(2)-O(2W)         | 2.357(5)   | Dy(2)-O(2W)         | 2.338(6)    |
| Dy(2)-O(1a)         | 2.341(4)   | Dy(2)-O(1a)         | 2.346(6)    |
| Dy(2)-O(1)          | 2.408(4)   | Dy(2)-O(1)          | 2.390(5)    |
| Dy(2)-N(8)          | 2.432(6)   | Dy(2)-N(8)          | 2.415(8)    |
| Dy(2)-N(3)          | 2.459(6)   | Dy(2)-N(3)          | 2.464(8)    |
| Dy(2)-N(10)         | 2.662(6)   | Dy(2)-N(10)         | 2.648(7)    |
| Dy(2)-N(5)          | 2.674(6)   | Dy(2)-N(5)          | 2.651(7)    |
| Dy(2a)-Dy(1)-Dy(2)  | 55.862(9)  | Dy(2a)-Dy(1)-Dy(2)  | 55.804(12)  |
| Dy(1a)-Dy(2)-Dy(2a) | 69.698(10) | Dy(1a)-Dy(2)-Dy(2a) | 69.765(14)  |
| Dy(1a)-Dy(2)-Dy(1)  | 124.138(9) | Dy(1a)-Dy(2)-Dy(1)  | 124.196(12) |
| Dy(2a)-Dy(2)-Dy(1)  | 54.440(9)  | Dy(2a)-Dy(2)-Dy(1)  | 54.431(12)  |
| Dy(2a)-O(1)-Dy(2)   | 106.52(17) | Dy(2a)-O(1)-Dy(2)   | 106.7(2)    |
| Dy(2a)-O(1)-Dy(1)   | 103.35(17) | Dy(2a)-O(1)-Dy(1)   | 102.9(2)    |
| Dy(2)-O(1)-Dy(1)    | 126.23(16) | Dy(2)-O(1)-Dy(1)    | 126.7(3)    |
| Dy(2a)-O(2)-Dy(1)   | 112.68(19) | Dy(2a)-O(2)-Dy(1)   | 112.8(2)    |

Symmetry codes: *a*) -x+1, -y+1, -z

Table S3. Variations of Dy-X bonds around Dy ions for complexes **1-3**

| <b>1</b> |       | <b>2</b> |       | <b>3</b> |       |
|----------|-------|----------|-------|----------|-------|
| Dy1-O2   | 2.252 | Dy1-O2   | 2.243 | Dy1-O2   | 2.248 |
| Dy1-O1   | 2.427 | Dy1-O1   | 2.432 | Dy1-O1   | 2.405 |
| Dy1-O1W  | 2.408 | Dy1-O1W  | 2.393 | Dy1-O6   | 2.382 |
| Dy1-Cl1  | 2.714 | Dy1-Br1  | 2.888 | Dy1-O9   | 2.411 |
| Dy1-N1   | 2.666 | Dy1-N1   | 2.662 | Dy1-N5   | 2.680 |
| Dy1-N2   | 2.440 | Dy1-N2   | 2.432 | Dy1-N2   | 2.394 |
| Dy1-N6   | 2.690 | Dy1-N6   | 2.688 | Dy1-N10  | 2.681 |
| Dy1-N7   | 2.428 | Dy1-N7   | 2.412 | Dy1-N7   | 2.435 |
| averaged | 2.503 | averaged | 2.518 | averaged | 2.454 |
| Dy2-O2   | 2.242 | Dy2-O2   | 2.243 | Dy2-O2   | 2.251 |
| Dy2-O1   | 2.408 | Dy2-O1   | 2.390 | Dy2-O1   | 2.408 |
| Dy2-O1a  | 2.341 | Dy2-O1a  | 2.346 | Dy2-O1a  | 2.333 |
| Dy2-O2W  | 2.357 | Dy2-O2W  | 2.338 | Dy2-O3   | 2.409 |
| Dy2-N3   | 2.459 | Dy2-N3   | 2.464 | Dy2-N1   | 2.417 |
| Dy2-N5   | 2.674 | Dy2-N5   | 2.651 | Dy2-N4   | 2.674 |
| Dy2-N8   | 2.432 | Dy2-N8   | 2.415 | Dy2-N6   | 2.420 |
| Dy2-N10  | 2.662 | Dy2-N10  | 2.648 | Dy2-N9   | 2.647 |
| averaged | 2.446 | averaged | 2.436 | Averaged | 2.444 |

Symmetry codes: a) -x+1,-y+1,-z

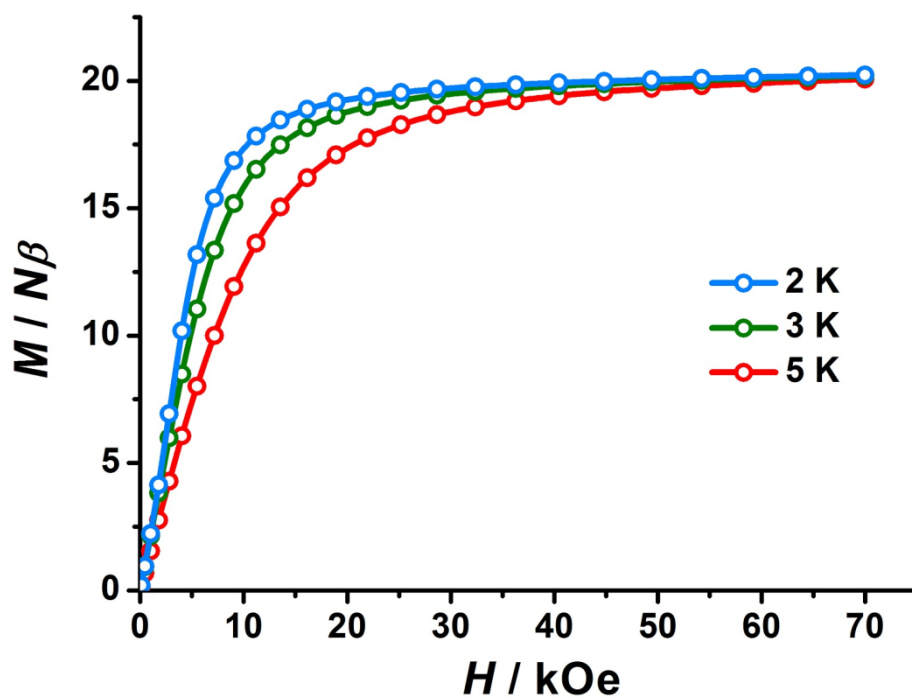

Figure S1.  $M$  versus  $H/T$  plot for **1** at indicated temperatures.

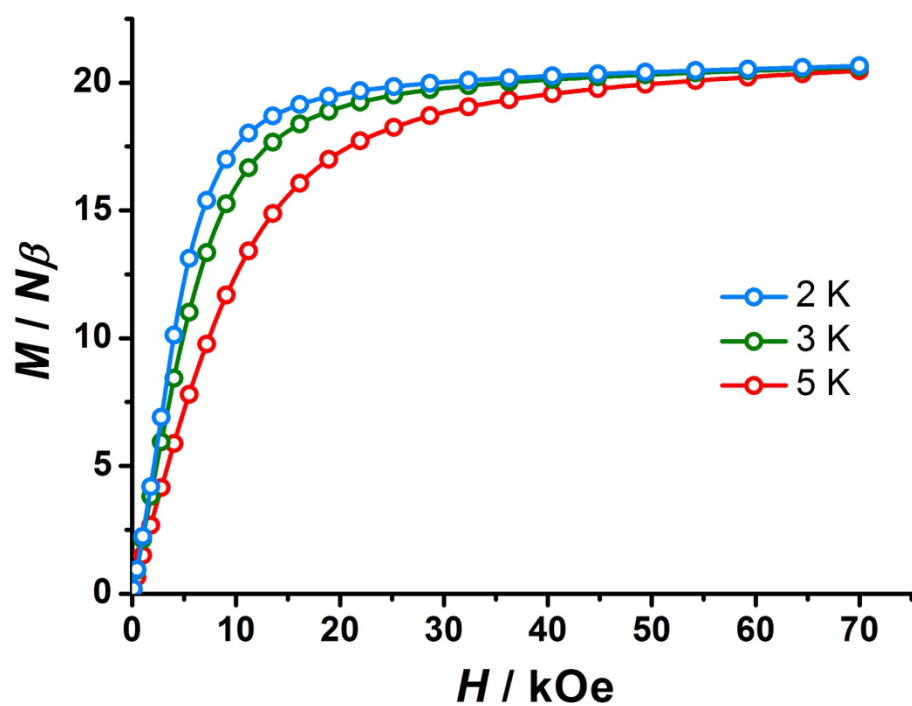

Figure S2.  $M$  versus  $H/T$  plot for **2** at indicated temperatures.

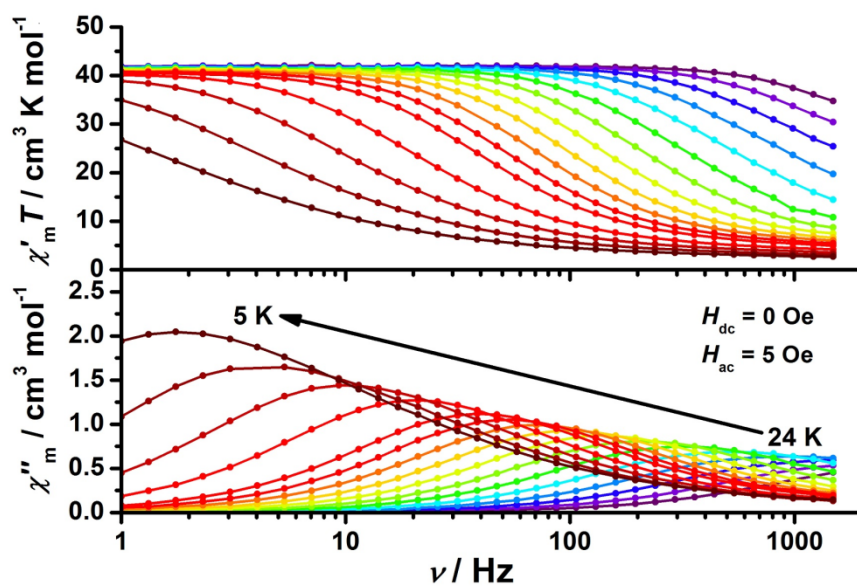

**Figure S3.** Frequency dependence of the in-phase ( $\chi'$ ) and out-of-phase ( $\chi''$ ) susceptibilities for **1** below 24 K under a zero dc field.

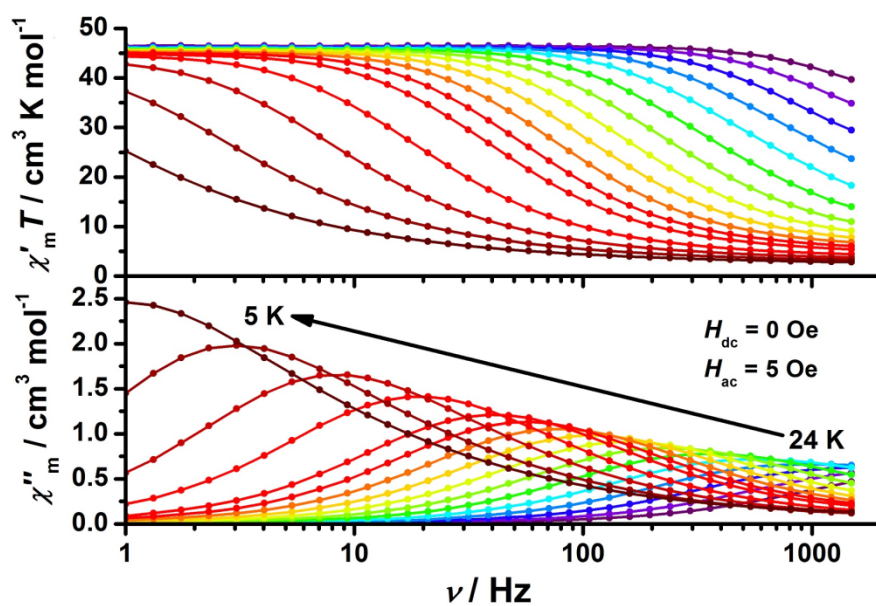

**Figure S4.** Frequency dependence of the in-phase ( $\chi'$ ) and out-of-phase ( $\chi''$ ) susceptibilities for **2** below 24 K under a zero dc field.

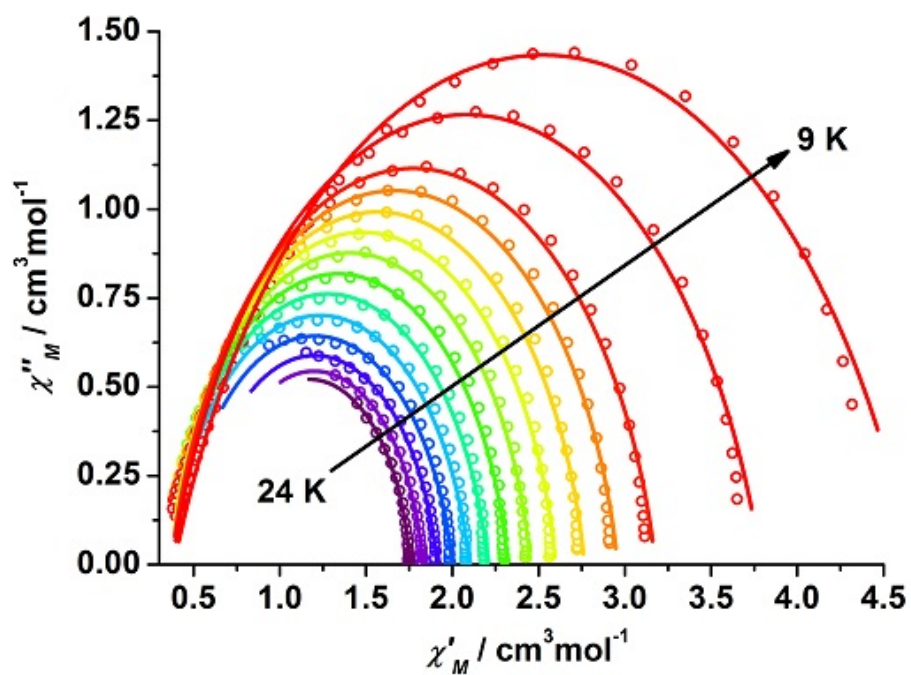

Figure S5. The Cole–Cole plots of 1. The solid lines correspond to the best fit.

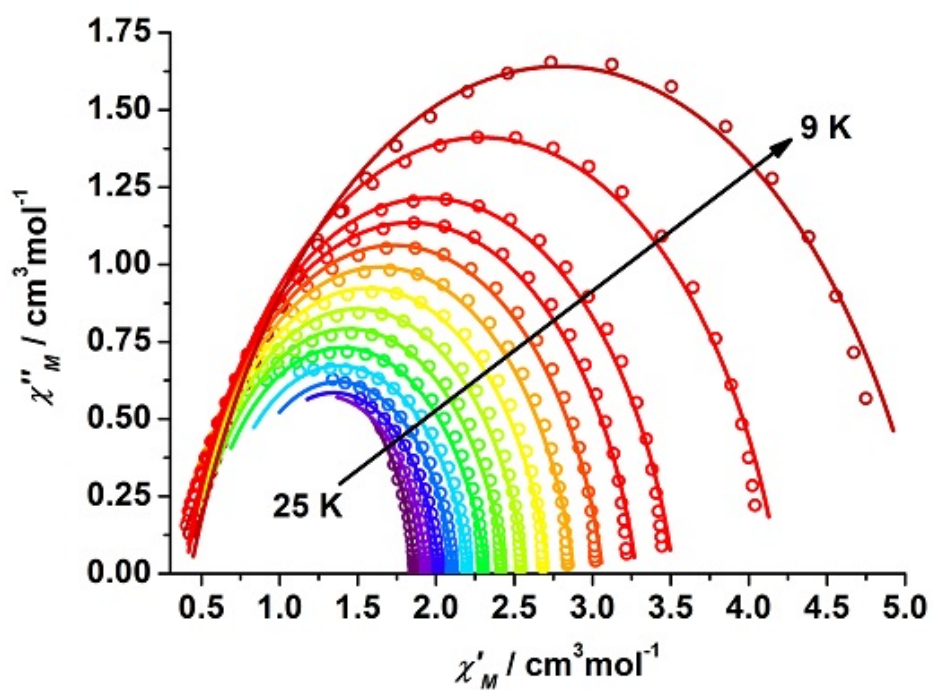

Figure S6. The Cole–Cole plots of 2. The solid lines correspond to the best fit.
